# Supplementary material
Source: PubMed Central journal article supplement (PMC3801434)

# Source Data

# Xia P, et al. Support Figure 1

For Figure 1B southern blot

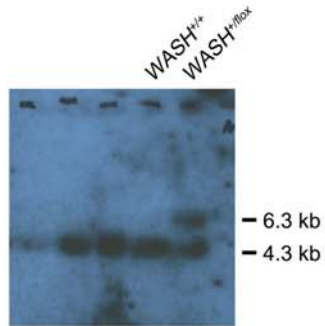

For Figure 1B loxP primers

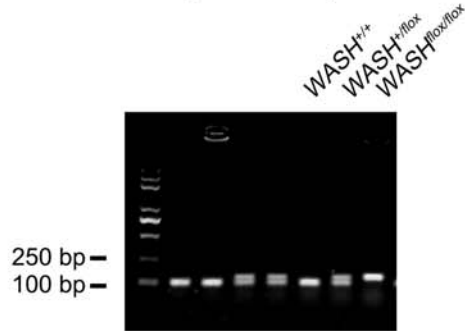

For Figure 1B KO primers

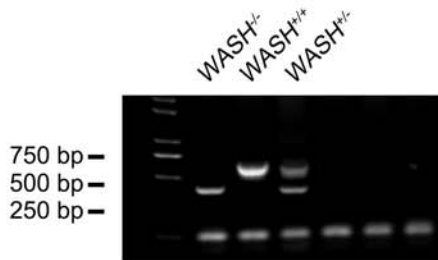

For Figure 1F IB: LC3

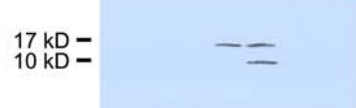

For Figure 1F IB: p62

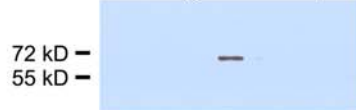

For Figure 1F IB: WASH

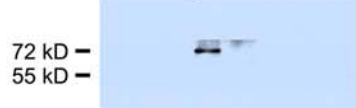

For Figure 1F IB:  $\beta$ -actin

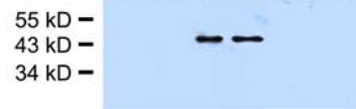

Supplement: emboj2013189df1.pdf [file emboj2013189df1.pdf]
