# Supplementary material
Source: PubMed Central journal article supplement (PMC3801434)

# Source Data

# Xia P, et al. Support Figure 2

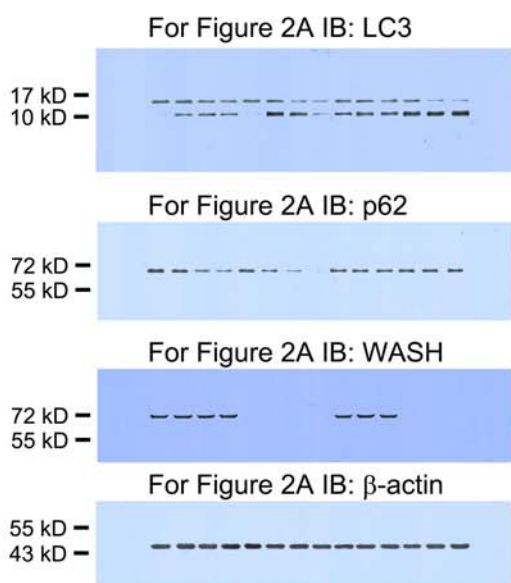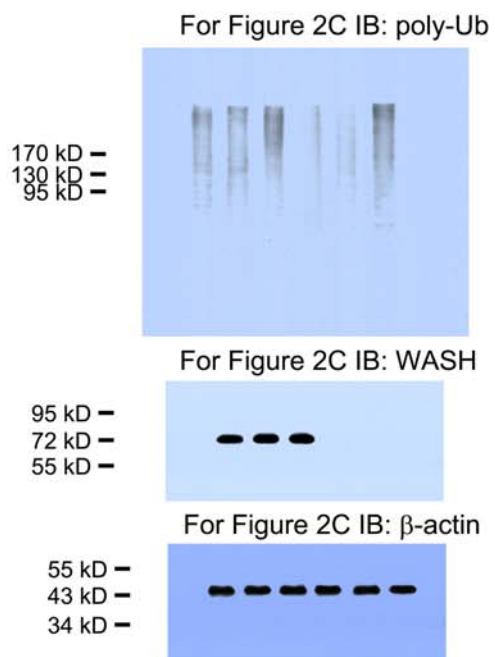

Supplement: emboj2013189df2.pdf [file emboj2013189df2.pdf]

Source Data

Xia P, et al. Support Figure 3

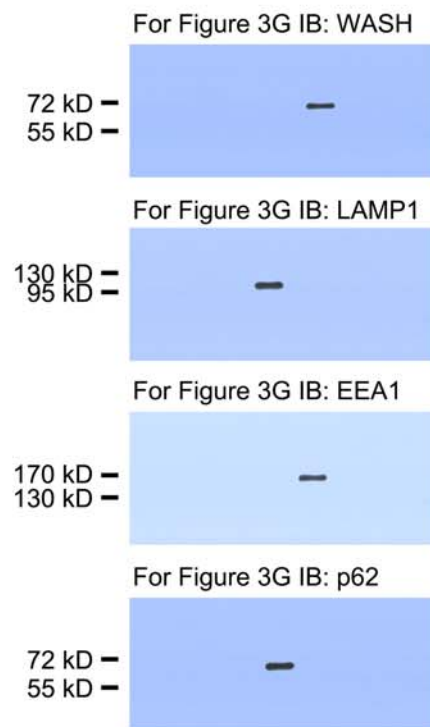

Supplement: emboj2013189df3.pdf [file emboj2013189df3.pdf]

# Source Data

# Xia P, et al. Support Figure 4

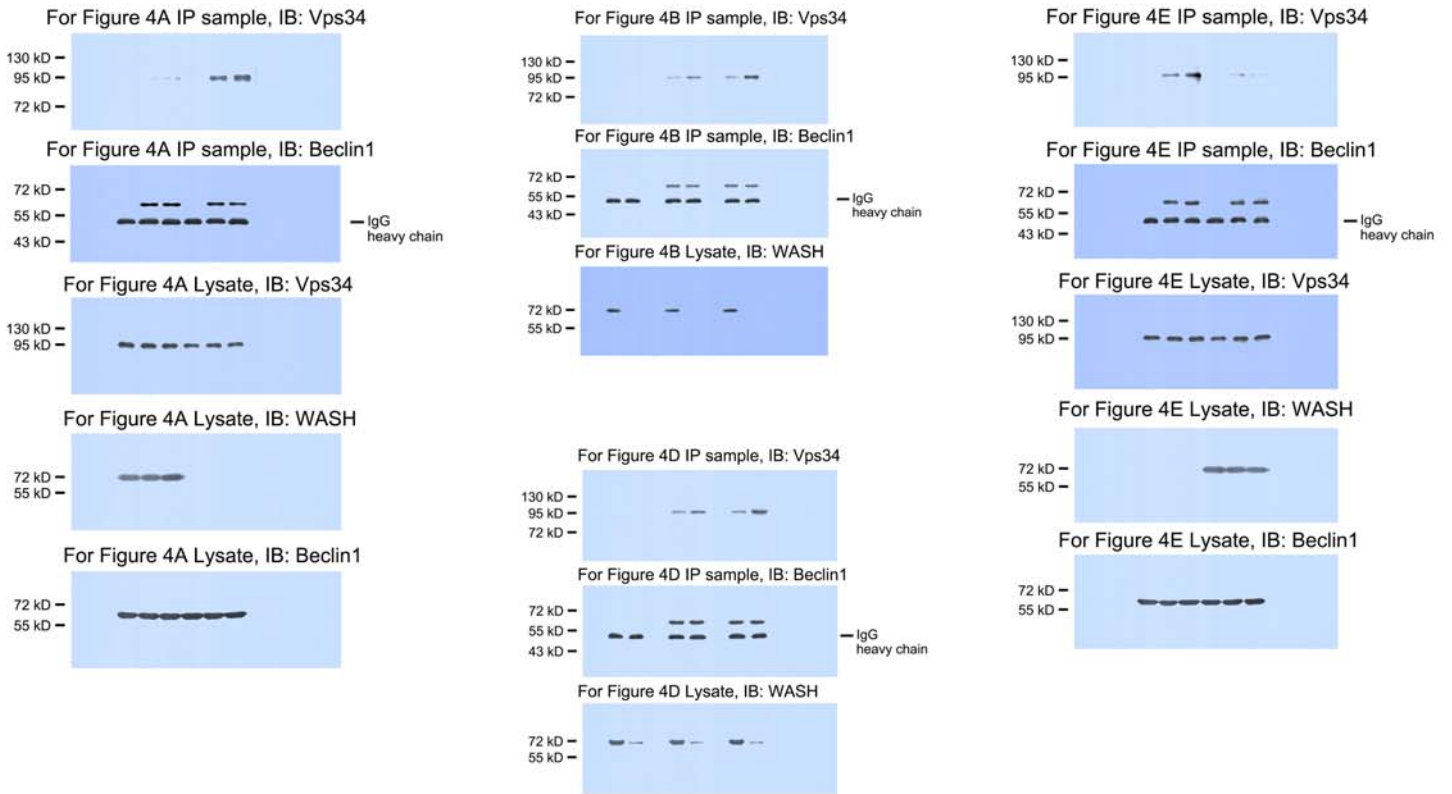

Supplement: emboj2013189df4.pdf [file emboj2013189df4.pdf]
